# Supplementary material for: First Disease and the Great Imitator: A Diagnostic Dilemma with Ancient Maladies
Source: Preprints.org preprint supplement (doi:10.20944/preprints202204.0071.v1), 2022-04-08
Supplement: Supplementary file 3 [file supplementary]

Case Report

First disease and the great imitator: a diagnostic dilemma with ancient maladies

Hisham Ahmed Imad 1,2,3*, Ploi Lakanavisid 2,4, Phimphan Pistutsan 2,5 Kentaro Trerattanavong 6, Thundon Ngamprasertchai 2,5, Wasin Matsee 2,5, Watcharapong Piyaphanee 2,5, Pornsawan Leaungwutiwong 7,8, Wang Nguitragool 1,9, Emi E. Nakayama 3 and Tatsuo Shioda 3

1 Mahidol Vivax Research Unit, Faculty of Tropical Medicine, Mahidol University, Bangkok 10400, Thailand; wang.ngu@mahidol.edu (W.N.)

2 Thai Travel Clinic, Hospital for Tropical Diseases, Faculty of Tropical Medicine, Mahidol University, Bangkok 10400, Thailand; ploi.la@go.buu.ac.th (P.L.); phimphan@thaitravelclinic.com (P.P.); thundon.ngm@mahidol.ac.th (T.N.); wasin.mat@mahidol.edu (W.M.); watcharapong.piy@mahidol.ac.th (W.P.)

3 Center for Infectious Disease Education and Research, Department of Viral Infections, Research Institute for Microbial Diseases, Osaka University, Suita 565-0871, Osaka, Japan; emien@biken.osaka-u.ac.jp (E.E.N.); shioda@biken.osaka-u.ac.jp (T.S.)

4 Department of Preventive Medicine and Family Medicine, Faculty of Medicine, Burapha University, Chonburi 20130, Thailand

5 Department of Clinical Tropical Medicine, Faculty of Tropical Medicine, Mahidol University,
Bangkok 10400, Thailand

6 Hull York Medical School, University of York, Heslington, YO10 5DD, United Kingdom; hykt2@hyms.ac.uk (K.T.)

7 Tropical Medicine Diagnostic Reference Laboratory, Faculty of Tropical Medicine, Mahidol University, Bangkok 10400, Thailand; pornsawan.lea@mahidol.ac.th (P.L.)

8  Department of Microbiology and Immunology, Faculty of Tropical Medicine, Mahidol University, Bangkok 10400, Thailand

9 Department of Molecular Tropical Medicine and Genetics, Faculty of Tropical Medicine, Mahidol University, Bangkok 10400, Thailand

***** Correspondence: hishamahmed.ima@mahidol.ac.th or imad@biken.osaka-u.ac.jp; Tel.: +66-631501402

**Figure S1.** The clinical course of hospitalization
